# Supplementary material for: Synthesis and Property Examination of Er2FeSbO7/BiTiSbO6 Heterojunction Composite Catalyst and Light-Catalyzed Retrogradation of Enrofloxacin in Pharmaceutical Waste Water under Visible Light Irradiation
Source: MDPI journal article supplement (doi:10.3390/ma15175906), 2022-08-26
Supplement: s1 [file s1]

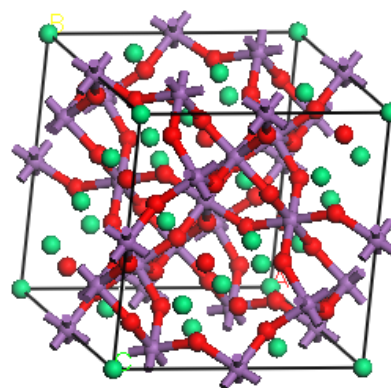

**Figure S1.** Atomic structure of  $\text{Er}_2\text{FeSbO}_7$ . (Red atom: O, green atom: Er, purple atom: Fe or Sb).

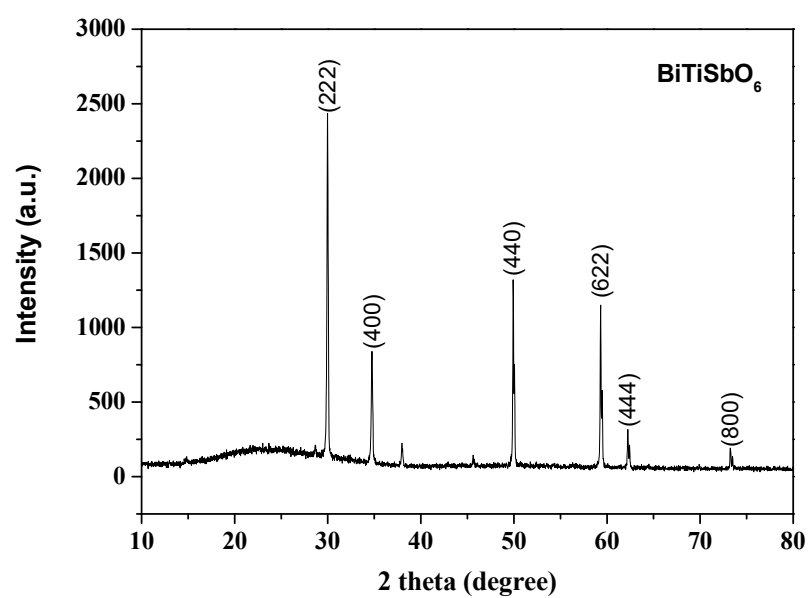

**Figure S2.** The X-ray diffraction spectrum of  $\text{BiTiSbO}_6$ .

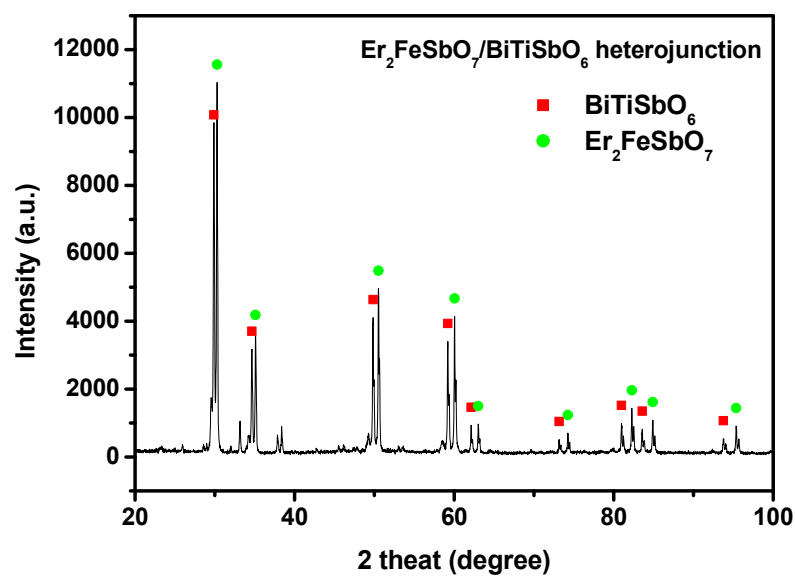

**Figure S3.** The X-ray diffraction pattern of  $\text{Er}_2\text{FeSbO}_7/\text{BiTiSbO}_6$  heterojunction after the reaction.

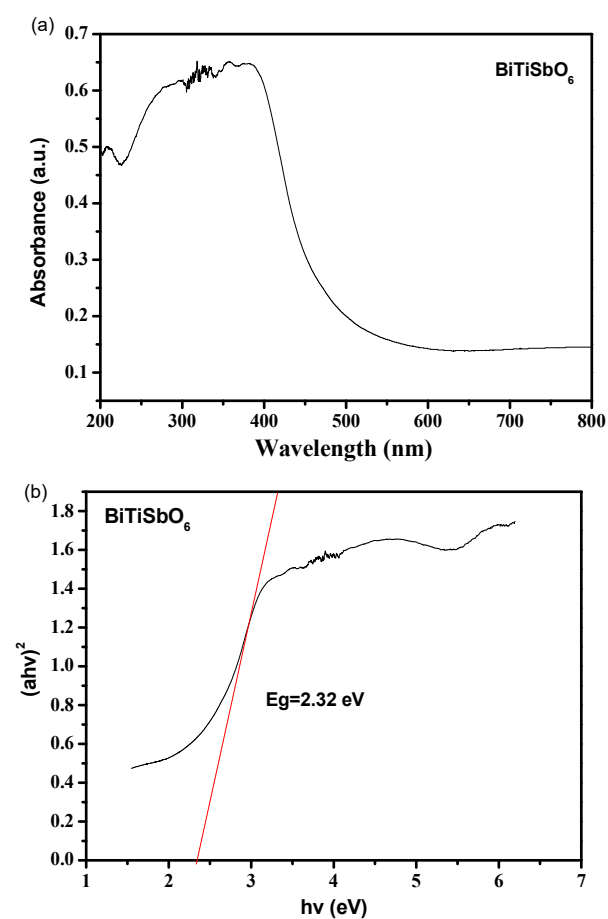

**Figure S4.** (a) UV-Vis diffuse reflectance spectra of  $\text{BiTiSbO}_6$ ; (b) Plot of  $(ah\nu)^2$  versus  $h\nu$  for  $\text{BiTiSbO}_6$ .

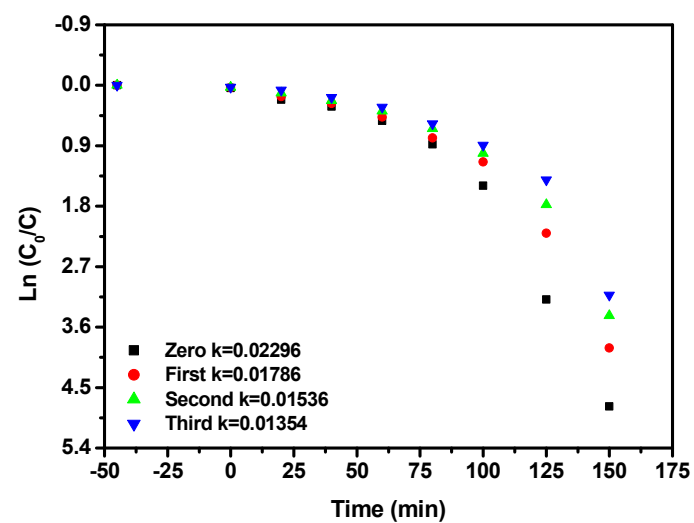

**Figure S5.** Observed first-order kinetic plots for the PCD of ENR with EBH as photocatalyst under VLGI for three cycle degradation tests.
